# Supplementary material for: Synthesis and evaluation of anticancer activity of new 9-acridinyl amino acid derivatives
Source: Royal Society of Chemistry journal article supplement (doi:10.1039/c9md00597h), 2020-01-01
Supplement: c9md00597h1.pdf [file c9md00597h1.pdf]

## Supplementary information

### Synthesis and evaluation of anticancer activity of new 9-acridinyl amino acid derivatives

Jelena Rugar,<sup>[a, b]</sup> Vladimir Dobričić,<sup>\*, [a]</sup> Jelena Grahovac,<sup>[c]</sup> Siniša Radulović,<sup>[c]</sup> Žiga Skok,<sup>[d]</sup>  
Janez Ilaš,<sup>[d]</sup> Mara Aleksić,<sup>[b]</sup> Jasmina Brborić,<sup>[a]</sup> Olivera Čudina<sup>[a]</sup>

[a] Department of Pharmaceutical Chemistry, University of Belgrade – Faculty of Pharmacy,  
Vojvode Stepe 450, 11000 Belgrade, Serbia

[b] Department of Physical Chemistry and Instrumental Methods, University of Belgrade –  
Faculty of Pharmacy, Vojvode Stepe 450, 11000 Belgrade, Serbia

[c] Department of Experimental Oncology, Institute for Oncology and Radiology of Serbia,  
Pasterova 14, Belgrade, Serbia

[d] University of Ljubljana, Faculty of Pharmacy, Chair of Pharmaceutical Chemistry,  
Aškerčeva 7, SI-1000 Ljubljana, Slovenia

\* Corresponding author:

Vladimir Dobričić, E-mail address: vladimir@pharmacy.bg.ac.rs

## **Table of Contents:**

|                                                                            |           |
|----------------------------------------------------------------------------|-----------|
| <b>Physicochemical characterization data of synthesized compounds</b>      | <b>1</b>  |
| <b>HPLC analysis</b>                                                       | <b>18</b> |
| <b>In silico evaluation of pharmacokinetic properties and druglikeness</b> | <b>22</b> |
| <b>References</b>                                                          | <b>23</b> |

## Physicochemical characterization data of synthesized compounds

**(S)-methyl 2-(acridin-9-ylamino)-3-phenylpropanoate (1).** Compound **1** was synthesized according to the general procedure, using sodium methoxide solution and L-phenylalanine methyl ester hydrochloride. This derivative was purified using preparative thin layer chromatography with mobile phases ethyl acetate/hexane 4:0.3 (v/v) and chloroform/methanol 9:1.6 (v/v). Yellow crystalline solid was obtained after recrystallization in diethyl ether. Yield 21%. Mp 176.0-179.5 °C. IR (ATR)  $\nu$  = 705.0, 789.20, 1209.67, 1470.37, 1587.16, 1739.65, 3236.92  $\text{cm}^{-1}$ .  $^1\text{H}$  NMR (400 MHz,  $\text{CDCl}_3$ )  $\delta$  8.26 (d, 2H,  $J$  = 6.8 Hz, H-4 and H-5), 7.96 (d, 2H,  $J$  = 8.8 Hz, H-1 and H-8), 7.71 (t, 2H,  $J$  = 7.6 Hz, H-3 and H-6), 7.39 (t, 2H,  $J$  = 8 Hz, H-2 and H-7), 7.20-7.31 (m, 5H, H-4', H-5', H-6', H-7' and H-8'), 5.03 (s, 1H, H-1'), 3.64 (s, 3H, -CH<sub>3</sub>), 3.40 (d, 2H, H-2').  $^{13}\text{C}$  NMR (100 MHz,  $\text{CDCl}_3$ )  $\delta$  135.31, 131.44, 129.55, 128.80, 127.64, 124.47, 122.59, 77.34, 77.22, 77.02, 76.70, 70.62, 62.73, 52.63, 40.13, 29.71.  $m/z$  = 357.4 ( $\text{M}^++1$ ), 206.18, 179.19, 297.26. MS  $[\text{M}+\text{H}]^+$  calculated for  $\text{C}_{23}\text{H}_{20}\text{N}_2\text{O}_2$  = 357.15248; observed = 357.15297.

**(S)-methyl 2-(acridin-9-ylamino)-3-(1H-imidazol-4-yl)propanoate (2).** Compound **2** was synthesized according to the general procedure, using sodium methoxide solution and L-histidine methyl ester dihydrochloride. The reaction mixture was purified using preparative thin layer chromatography with mobile phase chloroform/methanol 9:1.6 (v/v). Yellow crystalline solid was obtained after recrystallization in diethyl ether. Yield: 77%. Mp 95-97.5 °C. IR (ATR)  $\nu$  = 750.67, 1168.29, 1205.05, 1473.66, 1636.99, 1738.11, 2872.03  $\text{cm}^{-1}$ .  $^1\text{H}$  NMR (400 MHz,  $\text{CDCl}_3$ )  $\delta$  8.25 (d, 4H,  $J$  = 8.4 Hz, H-1, H-4, H-5 and H-8), 7.63-7.69 (m, 3H, H-3, H-6 and H-5'), 7.37 (t, 2H,  $J$ =7.6 Hz, H-2 and H-7), 6.95 (s, 1H, H-7'), 5.28 (t, 1H,  $J$ =4.4 Hz, H-1'), 3.68 (s, 3H, -CH<sub>3</sub>), 3.30-3.49 (m, 2H, H-2').  $^{13}\text{C}$  NMR (100 MHz,  $\text{CDCl}_3$ )  $\delta$  171.30, 154.80, 143.30, 135.65, 133.00, 124.11, 123.90, 123.36, 114.76, 61.81, 52.98, 30.76.

$m/z = 347.1$  ( $M^{+}+1$ ), 205.98, 178.99, 234.96. MS  $[M+H]^{+}$  calculated for  $C_{20}H_{19}N_4O_2 = 347.14298$ ; observed = 347.14966.

**(S)-methyl 2-(acridin-9-ylamino)-3-(1-methyl-1H-indol-3-yl)propanoate (3).** Compound **3** was synthesized according to the general procedure, using sodium methoxide solution and 1-methyl-L-tryptophan methyl ester hydrochloride. The reaction mixture was purified using preparative thin layer chromatography with mobile phases chloroform/methanol 9:1.6 (v/v) and ethyl acetate/hexane 4:1 (v/v). Yellow crystalline solid was obtained after recrystallization in diethyl ether. Yield: 31%. Mp 55-58.5 °C. IR (ATR)  $\nu = 738.83, 1205.01, 1441.65, 1470.75, 1525.13, 1557.74, 1737.67\text{ cm}^{-1}$ .  $^1\text{H}$  NMR (400 MHz, DMSO)  $\delta$  ppm 8.12-8.15 (m, 2H, H-1 and H-8), 7.51-7.74 (m, 6H, H-2, H-3, H-4, H-5, H-6 and H-7), 7.33 (d, 1H,  $J=8\text{ Hz}$ , H-10'), 7.09-7.15 (m, 3H, H-4', H-7', H-8'), 6.95 (t, 1H,  $J=7.6\text{ Hz}$ , H-9'), 5.02 (s, 1H, H-1'), 3.64 (s, 3H,  $-\text{CH}_3$ ), 3.54 (s, 3H, H-12'), 3.49-3.50 (m, 2H, H-2').  $^{13}\text{C}$  NMR (100MHz, DMSO),  $\delta$  173.12, 136.95, 131.16, 129.00, 127.87, 121.54, 119.01, 118.85, 110.03, 52.41, 32.64.  $m/z = 410.2$  ( $M^{+}+1$ ), 174.06, 216.04, 144.07. MS  $[M+H]^{+}$  calculated for  $C_{26}H_{24}O_2N_3 = 410.17903$ ; observed = 410.18594.

**(S)-2-(acridin-9-ylamino)-3-(1-methyl-1H-indol-3-yl)propanoic acid (4).** Compound **4** was synthesized according to the general procedure, using sodium methoxide solution and 1-methyl-L-tryptophan. The reaction mixture was purified using preparative thin layer chromatography with mobile phase chloroform/methanol 9:2 (v/v). Orange crystalline solid was obtained after recrystallization in chloroform/methanol 5:5 (v/v). Yield: 57%. Mp 43-46.5 °C. IR (ATR)  $\nu = 737.28, 1271.24, 1370.64, 1529.12, 1586.03, 1634.44, 2850.80, 2920.97.\text{ cm}^{-1}$ .  $^1\text{H}$  NMR (400 MHz,  $\text{CD}_3\text{OD}$ )  $\delta$  8.01 (d, 2H,  $J = 8.4\text{ Hz}$ , H-1 and H-8), 7.63 (t, 2H,  $J=8\text{ Hz}$ , H-3 and H-6), 7.40 (d, 2H,  $J=8.4\text{ Hz}$ , H-4 and H-5), 7.17 (t, 2H,  $J=7.6\text{ Hz}$ , H-2 and H-7), 6.98 (d, 1H,  $J=7.6\text{ Hz}$ , H-10'), 6.83-6.92 (m, 2H, H-7' and H-8'), 6.68 (s, 1H, H-4'), 6.52 (t, 1H,  $J=7.2\text{ Hz}$ , H-9'), 5.23 (s, 1H, H-1'), 3.55-3.59 (m, 2H, H-2'), 3.30 (s, 3H, H-

12').  $^{13}\text{C}$  NMR (100 MHz,  $\text{CD}_3\text{OD}$ )  $\delta$  156.98, 139.09, 136.58, 134.39, 130.95, 128.17, 127.27, 123.16, 120.96, 118.43, 117.94, 117.69, 112.39, 108.59, 108.53, 64.28, 30.99, 29.34.  $m/z$  = 396.1 ( $\text{M}^+ + 1$ ), 195.05, 144.06, 202.03. MS  $[\text{M} + \text{H}]^+$  calculated for  $\text{C}_{25}\text{H}_{22}\text{O}_2\text{N}_3$  = 396.16338; observed = 396.17023.

**Methyl 8-(acridin-9-ylamino)octanoate (5).** Compound **5** was synthesized according to the general procedure, using sodium methoxide solution and 8-aminooctanoic acid methyl ester hydrochloride. The reaction mixture was purified using preparative thin layer chromatography with mobile phase chloroform/methanol 9:1.6 (v/v). Yellow crystalline solid was obtained after recrystallization in diethyl ether. Yield: 38%. Mp 106.3-109.0 °C. IR (ATR)  $\nu$  = 662.28, 748.69, 1165.98, 1466.81, 1566.82, 1633.69, 1734.35, 2738.24  $\text{cm}^{-1}$ .  $^1\text{H}$  NMR (400 MHz,  $\text{CDCl}_3$ )  $\delta$  8.18 (d, 2H,  $J$ =8 Hz, H-4 and H-5), 7.95 (d, 2H,  $J$ =8 Hz, H-1 and H-8), 7.41 (d, 2H,  $J$ =7.2 Hz, H-3 and H-6), 7.17 (t, 2H,  $J$ =8 Hz, H-2 and H-7), 4.04 (t, 2H,  $J$ =7.6 Hz,  $2\times\text{H-1}'$ ), 3.67 (s, 3H,  $3\times\text{H-8}'$ ), 2.39 (t, 2H,  $J$ =7.2 Hz,  $2\times\text{H-7}'$ ), 2.02 (quin, 2H,  $J$ =7.2 Hz,  $2\times\text{H-6}'$ ), 1.55-1.66 (m, 4H,  $2\times\text{H-2}'$  and  $2\times\text{H-3}'$ ), 1.38-1.46 (m, 4H,  $2\times\text{H-4}'$  and  $2\times\text{H-5}'$ ).  $^{13}\text{C}$  NMR (100 MHz,  $\text{CDCl}_3$ )  $\delta$  174.18, 155.70, 141.16, 132.92, 124.75, 122.80, 121.04, 112.91, 51.48, 48.75, 33.97, 30.55, 28.97, 28.94, 26.76, 24.77.  $m/z$  = 351.2 ( $\text{M}^+ + 1$ ), 195.03, 150.99, 178.01. MS  $[\text{M} + \text{H}]^+$  calculated for  $\text{C}_{22}\text{H}_{27}\text{O}_2\text{N}_2$  = 351.19943; observed = 351.20621.

**Ethyl 4-(acridin-9-ylamino)butanoate (6).** Compound **6** was synthesized according to the general procedure, using sodium ethoxide solution and 4-aminobutyric acid ethyl ester hydrochloride. The reaction mixture was purified using preparative thin layer chromatography with mobile phase chloroform/methanol 9:1.6 (v/v). Yellow crystalline solid was obtained after recrystallization in diethyl ether. Yield: 36%. Mp 148-150.5 °C. IR (ATR)  $\nu_{\text{max}}$  ( $\text{cm}^{-1}$ ): 747.07, 1171.20, 1477.01, 1569.49, 1588.35, 1635.85, 1725.72, 2779.74.  $^1\text{H}$  NMR (400 MHz, DMSO)  $\delta$  ppm 8.58 (d, 2H,  $J$  = 8 Hz, H-4 and H-5), 7.92 (s, 4H, H-1, H-3, H-6 and H-8), 7.52 (d, 2H,  $J$  = 6.4, H-2 and H-7), 4.10 (2H, s,  $2\times\text{H-4}'$ ), 4.00 (2H, q,  $J$  = 7.2 Hz,  $2\times\text{H-1}'$ ), 2.13-

2.17 (m, 2H, 2×H-2'), 1.12 (3H, t, J=6.8, 3×H-5'). <sup>13</sup>C NMR (100 MHz, DMSO), δ ppm 172.98, 157.40, 140.78, 134.90, 126.36, 123.57, 119.57, 113.25, 60.43, 31.45, 31.18, 24.90, 14.49. m/z = 309.1 (M<sup>+</sup>+1), 87.10, 195.02, 281.01. MS [M+H]<sup>+</sup> calculated for C<sub>19</sub>H<sub>21</sub>O<sub>2</sub>N<sub>2</sub> = 309.15248; observed = 309.15955.

**Propyl 4-(acridin-9-ylamino)butanoate (7).** Compound **7** was synthesized according to the general procedure, using sodium propoxide solution and 4-aminobutyric acid propyl ester hydrochloride. The reaction mixture was purified using preparative thin layer chromatography with mobile phases ethyl acetate/hexane 4:1 (v/v) and chloroform/methanol 9:1 (v/v). Yellow crystalline solid was obtained after recrystallization in diethyl ether. Yield: 42%. Mp 156.5-159.8 °C. IR (ATR) ν = 664.40, 745.42, 939.82, 1172.32, 1467.45, 1588.44, 1635.45, 1730.53, 2778.87 cm<sup>-1</sup>. <sup>1</sup>H NMR (400 MHz, CDCl<sub>3</sub>) δ 8.28 (d, 2H, J=8.8 Hz, H-4 and H-5), 8.09 (d, 2H, J=8.4 Hz, H-1 and H-8), 7.49 (t, 2H, J=7.2 Hz, H-3 and H-6), 7.21-7.25 (m, 2H, H-2 and H-7), 4.22 (t, 2H, J=6.8 Hz, 2×H-4'), 4.11 (t, 2H, J=6.8 Hz, 2×H-1'), 2.73 (t, 2H, J=6.4 Hz, 2×H-3'), 2.36 (quin, 2H, J=6.4 Hz, 2×H-2'), 1.63-1.70 (m, 2H, 2×H-5'), 0.95 (t, 3H, J=7.2 Hz, 3×H-6'). <sup>13</sup>C NMR (100 MHz, CDCl<sub>3</sub>) δ 174.15, 133.70, 124.89, 123.13, 119.98, 112.30, 66.83, 48.72, 32.00, 24.87, 21.94, 10.37. m/z = 323.2 (M<sup>+</sup>+1), 87.11, 195.07, 281.11. MS [M+H]<sup>+</sup> calculated for C<sub>20</sub>H<sub>23</sub>O<sub>2</sub>N<sub>2</sub> = 323.16813; observed = 323.17508.

**Ethyl 3-(acridin-9-ylamino)propanoate (8).** Compound **8** was synthesized according to the general procedure, using sodium ethoxide solution and β-alanine ethyl ester hydrochloride. The reaction mixture was purified using preparative thin layer chromatography with mobile phase chloroform/ethanol 9:1.6 (v/v). Yellow crystalline solid was obtained after recrystallization in diethyl ether. Yield: 29%. Mp 29.7-32.5 °C. IR (ATR) ν = 741.88, 1019.40, 1186.82, 1514.04, 1725.16, 3317.52 cm<sup>-1</sup>. <sup>1</sup>H NMR (400 MHz, CDCl<sub>3</sub>) δ 8.16 (d, 2H, J=8.4 Hz, H-4 and H-5), 8.08 (d, 2H, J=8.4 Hz, H-1 and H-8), 7.63 (t, 2H, J=7.2 Hz, H-3 and H-6), 7.36 (t, 2H, J=7.2 Hz, H-2 and H-7), 4.21 (q, 2H, J=7.2 Hz, H-3'), 4.11 (t, 2H, J=6

Hz, H-1'), 2.81 (t, 2H, J=6 Hz, H-2'), 1.27 (t, 3H, J=7.2 Hz, H-4'). <sup>13</sup>C NMR (100 MHz, CDCl<sub>3</sub>) δ 172.44, 152.50, 146.88, 130.97, 127.07, 123.61, 123.34, 116.76, 61.14, 45.89, 34.90, 14.17. m/z = 295.2 (M<sup>+</sup>+1), 207.07, 206.06, 267.08. MS [M+H]<sup>+</sup> calculated for C<sub>18</sub>H<sub>19</sub>O<sub>2</sub>N<sub>2</sub> = 295.13683; observed = 295.14413.

**Propyl 3-(acridin-9-ylamino)propanoate (9).** Compound **9** was synthesized according to the general procedure, using sodium propoxide solution and β-alanine propyl ester hydrochloride. The reaction mixture was purified using preparative thin layer chromatography with mobile phase chloroform/propanol 9:1.6 (v/v). Yellow crystalline solid was obtained after recrystallization in diethyl ether. Yield: 22%. Mp 33-35.5 °C. IR (ATR) ν = 742.56, 753.98, 1139.08, 1183.86, 1512.75, 1562.24, 1723.97, 3311.60 cm<sup>-1</sup>. <sup>1</sup>H NMR (400 MHz, CDCl<sub>3</sub>) δ 8.14 (d, 2H, J=8.8 Hz, H-4 and H-5), 8.09 (d, 2H, J=8.4 Hz, H-1 and H-8), 7.66 (t, 2H, J=7.2 Hz, H-3 and H-6), 7.38 (t, 2H, J=7.2 Hz, H-2 and H-7), 4.06-4.14 (m, 4H, 2×H-1' and 2×H-3'), 2.77 (t, 2H, J=6 Hz, 2×H-2'), 1.64-1.69 (m, 2H, 2×H-4'), 0.94 (t, 3H, J=7.2 Hz, 3×H-5'). <sup>13</sup>C NMR (100 MHz, CDCl<sub>3</sub>) δ 172.71, 151.97, 130.63, 127.97, 123.67, 123.09, 117.23, 66.75, 46.02, 34.90, 21.92, 10.35. m/z = 309.2 (M<sup>+</sup>+1), 207.06, 267.08, 179.07. MS [M+H]<sup>+</sup> calculated for C<sub>19</sub>H<sub>21</sub>O<sub>2</sub>N<sub>2</sub> = 309.15248; observed = 309.15948.

**Ethyl 6-(acridin-9-ylamino)hexanoate (10).** Compound **10** was synthesized according to the general procedure, using sodium ethoxide solution and 6-aminohexanoic acid ethyl ester hydrochloride. The reaction mixture was purified using preparative thin layer chromatography with mobile phase chloroform/methanol 9:1.6 (v/v). Yellow crystalline solid was obtained after recrystallization in diethyl ether. Yield: 33%. Mp 169.5-172.0 °C. IR (ATR) ν = 663.28, 751.97, 836.63, 868.97, 1173.36, 1468.92, 1529.01, 1566.20, 1587.08, 1634.41, 1723.38, 2804.29 cm<sup>-1</sup>. <sup>1</sup>H NMR (400 MHz, DMSO-d<sub>6</sub>) δ 8.59 (d, 2H, J=6.8 Hz, H-4 and H-5), 7.93-7.99 (m, 4H, H-1, H-3, H-6 and H-8), 7.53 (t, 2H, J=6.8 Hz, H-2 and H-7), 3.99-4.09 (m, 4H, 2×H-1' and 2×H-6'), 2.29 (t, 2H, J=7.2 Hz, 2×H-5'), 1.89-1.92 (m, 2H, 2×H-4'), 1.56-1.59

(m, 2H, 2×H-2'), 1.30-1.45 (m, 2H, 2×H-3'), 1.14 (t, 3H, J=7.2 Hz, 3×H-7'). <sup>13</sup>C NMR (100 MHz, DMSO-d<sub>6</sub>) δ 173.21, 157.76, 135.26, 126.49, 123.71, 119.18, 60.13, 49.13, 33.77, 29.01, 26.10, 24.49, 14.57. m/z = 337.2 (M<sup>+</sup>+1), 195.06, 309.16, 69.26. MS [M+H]<sup>+</sup> calculated for C<sub>21</sub>H<sub>25</sub>O<sub>2</sub>N<sub>2</sub> = 337.18378; observed = 337.19083.

**Propyl 6-(acridin-9-ylamino)hexanoate (11).** Compound **11** was synthesized according to the general procedure, using sodium propoxide solution and 6-aminohexanoic acid propyl ester hydrochloride. The reaction mixture was purified using preparative thin layer chromatography with mobile phases ethyl acetate/hexane 4:1 (v/v) and chloroform/methanol 9:1.6 (v/v). Yellow crystalline solid was obtained after recrystallization in diethyl ether. Yield: 32%. Mp 145.7-149.3 °C. IR (ATR) ν = 662.50, 765.32, 1177.03, 1272.97, 1333.36, 1469.40, 1587.02, 1633.56, 1720.98, 2850.50 cm<sup>-1</sup>. <sup>1</sup>H NMR (400 MHz, DMSO-d<sub>6</sub>) δ 8.55 (d, 2H, J=8.8 Hz, H-4 and H-5), 7.91-7.92 (m, 4H, H-1, H-3, H-6 and H-8), 7.50 (t, 2H, J=6.4 Hz, H-2 and H-7), 4.04 (t, 2H, J= 6.8 Hz, 2×H-6'), 3.93 (t, 2H, J=6.4 Hz, 2×H-1'), 2.30 (t, 2H, J=7.2 Hz, 2×H-5'), 1.87-1.90 (m, 2H, 2×H-4'), 1.51-1.59 (m, 4H, 2×H-2' and 2×H-7'), 1.37-1.41 (m, 2H, 2×H-3'), 0.84 (t, 3H, J=7.2 Hz, 3×H-8'). <sup>13</sup>C NMR (100 MHz, DMSO-d<sub>6</sub>) δ 173.28, 134.60, 126.35, 123.46, 120.11, 65.61, 49.36, 33.80, 29.30, 26.16, 24.56, 21.98, 10.69. m/z = 351.2 (M<sup>+</sup>+1), 195.00, 309.03, 69.26. MS [M+H]<sup>+</sup> calculated for C<sub>22</sub>H<sub>27</sub>O<sub>2</sub>N<sub>2</sub> = 351.19943; observed = 351.20612.





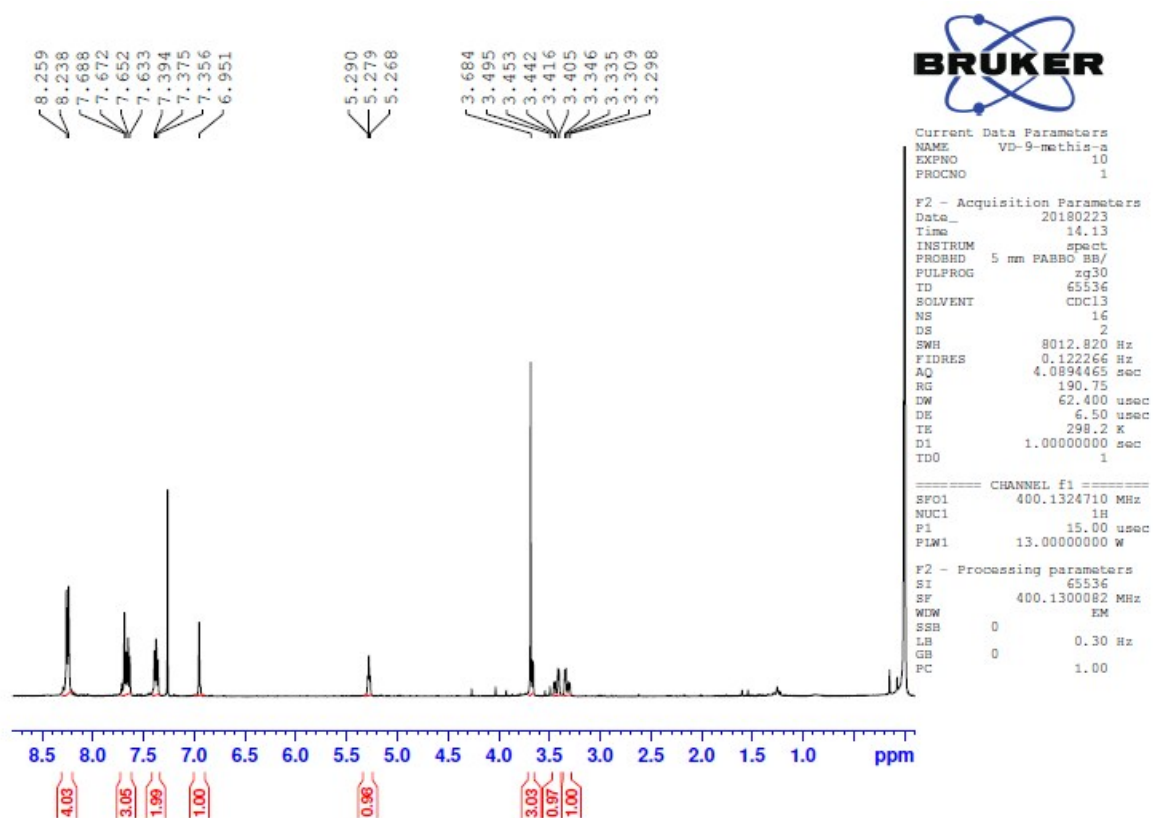

Figure S3. Compound 2 –  $^1\text{H}$  NMR

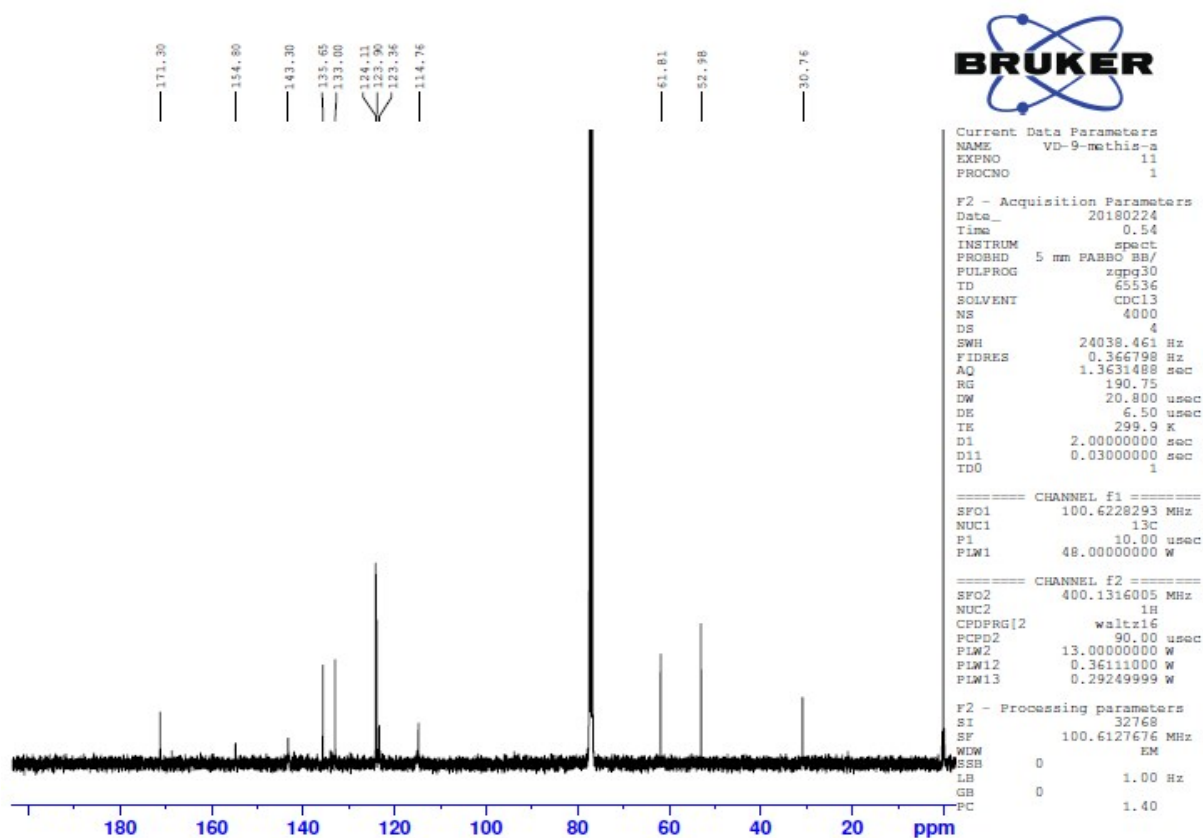

Figure S4. Compound 2 –  $^{13}\text{C}$  NMR

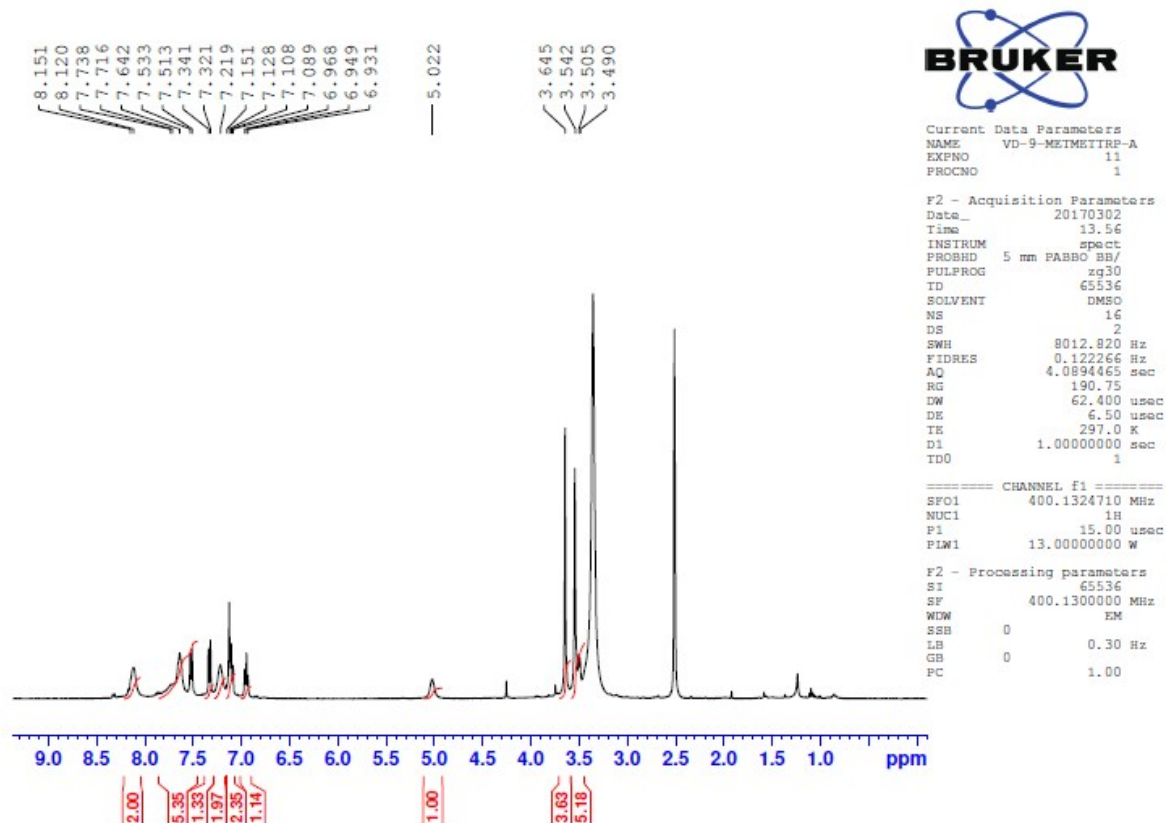

Figure S5. Compound 3 –  $^1\text{H}$  NMR

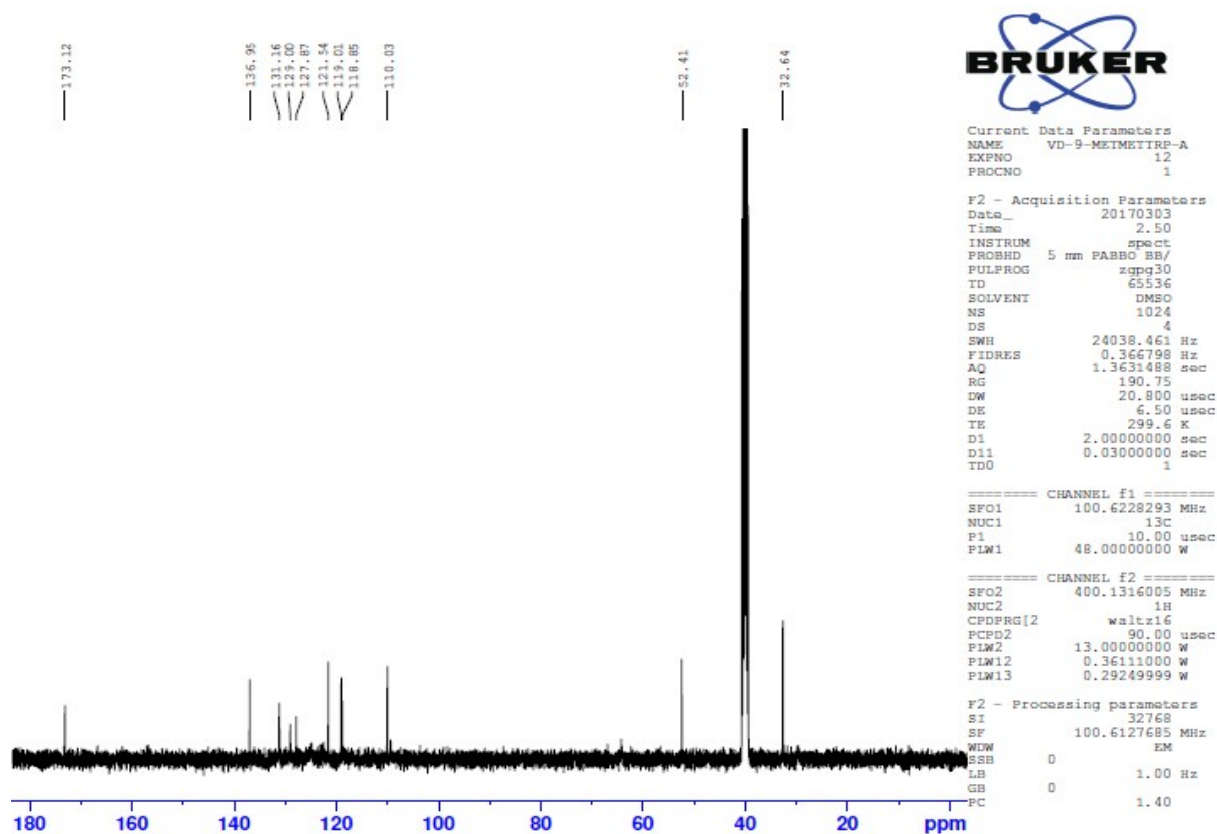

Figure S6. Compound 3 –  $^{13}\text{C}$  NMR

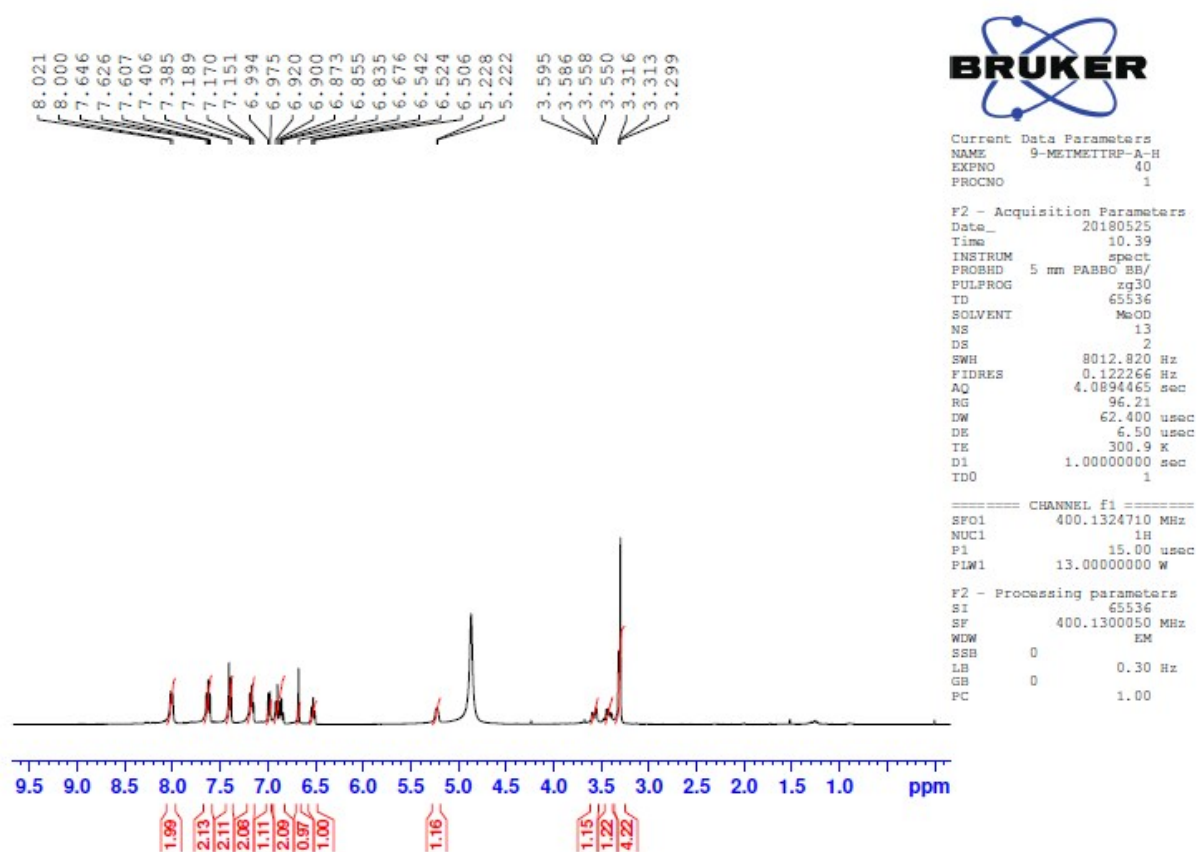

Figure S7. Compound 4 –  $^1\text{H}$  NMR

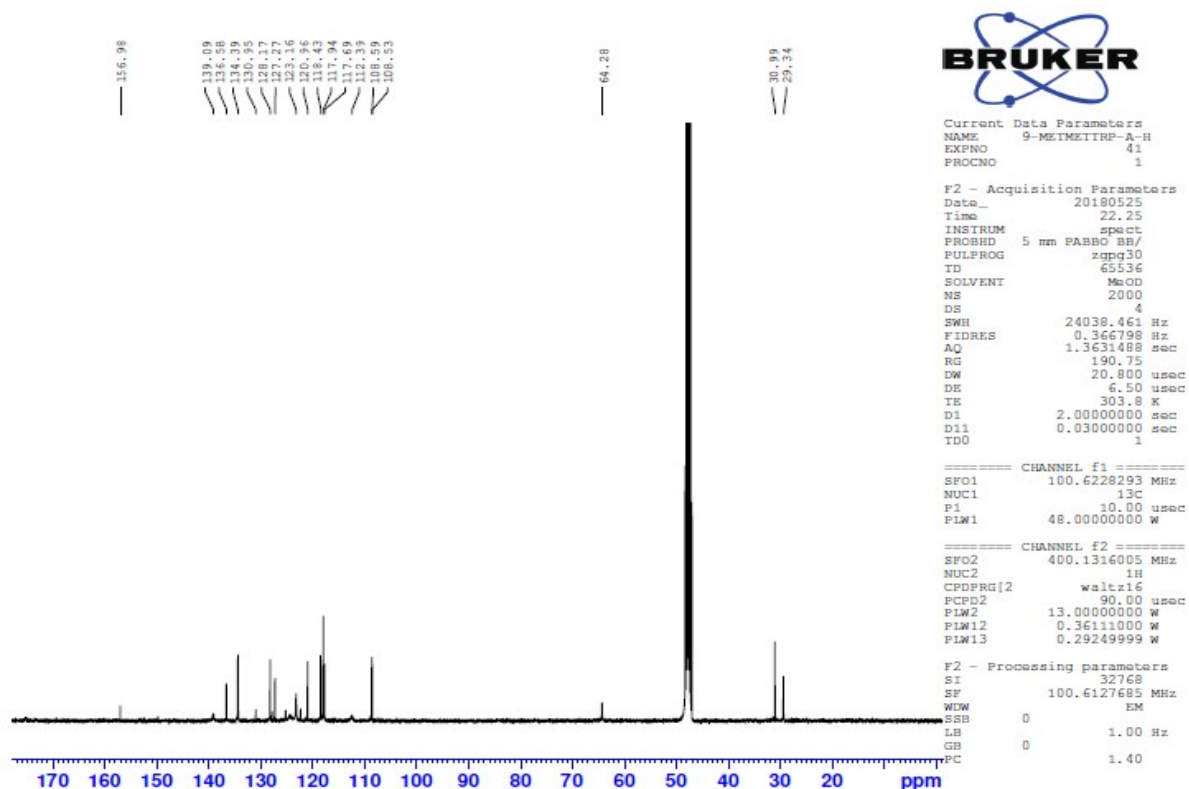

Figure S8. Compound 4 –  $^{13}\text{C}$  NMR

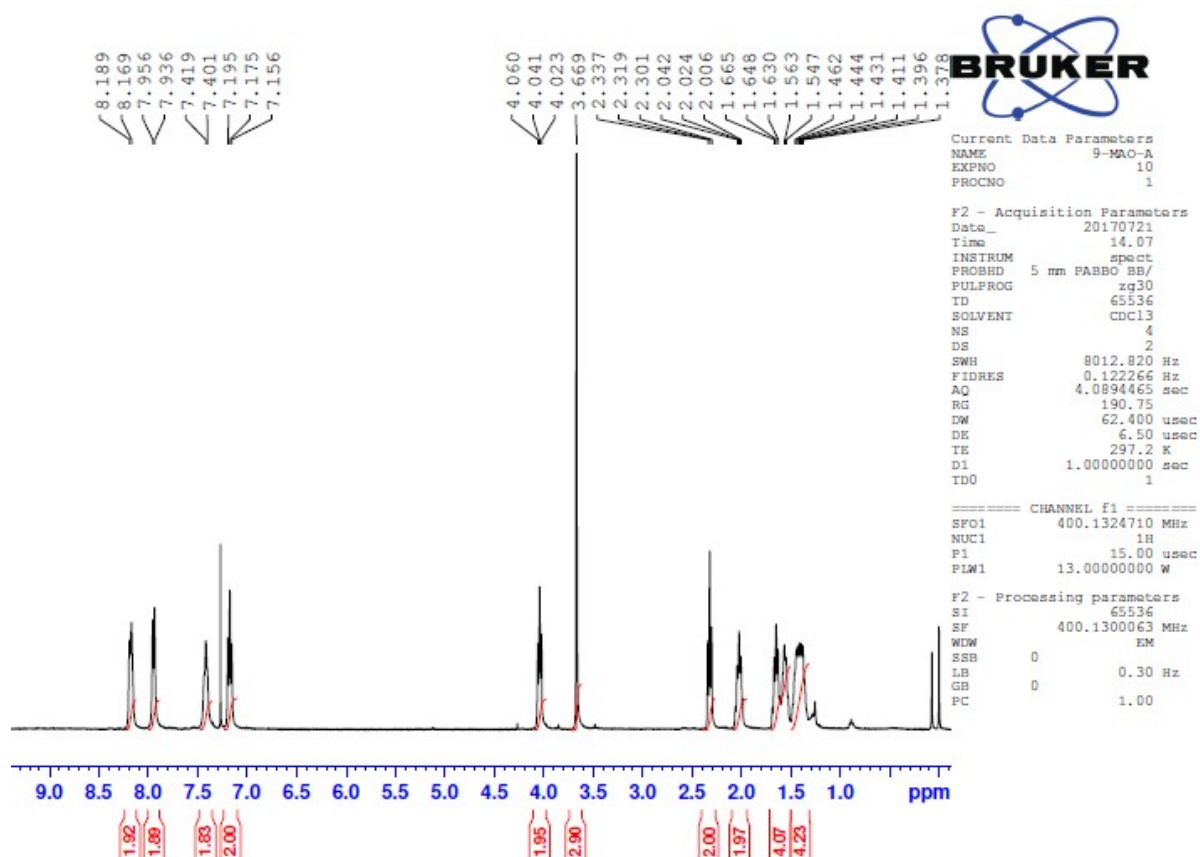

Figure S9. Compound 5 –  $^1\text{H}$  NMR

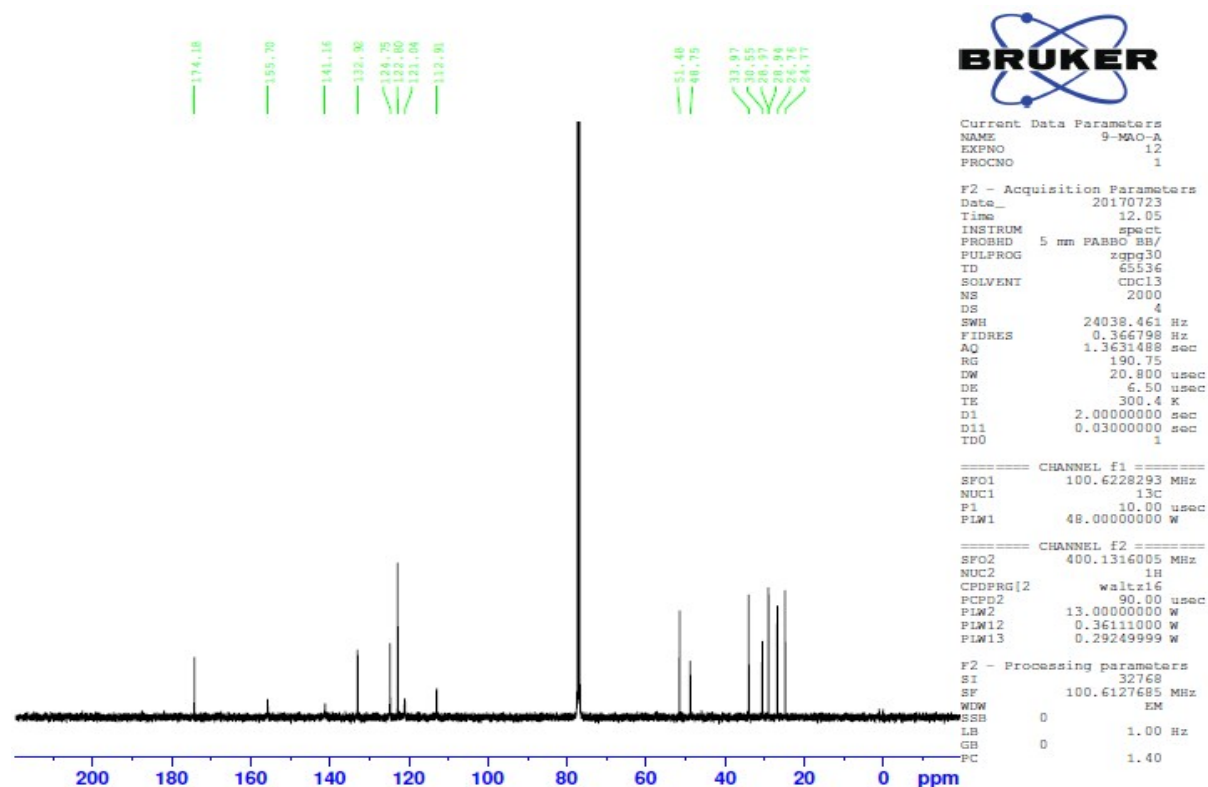

Figure S10. Compound 5 –  $^{13}\text{C}$  NMR



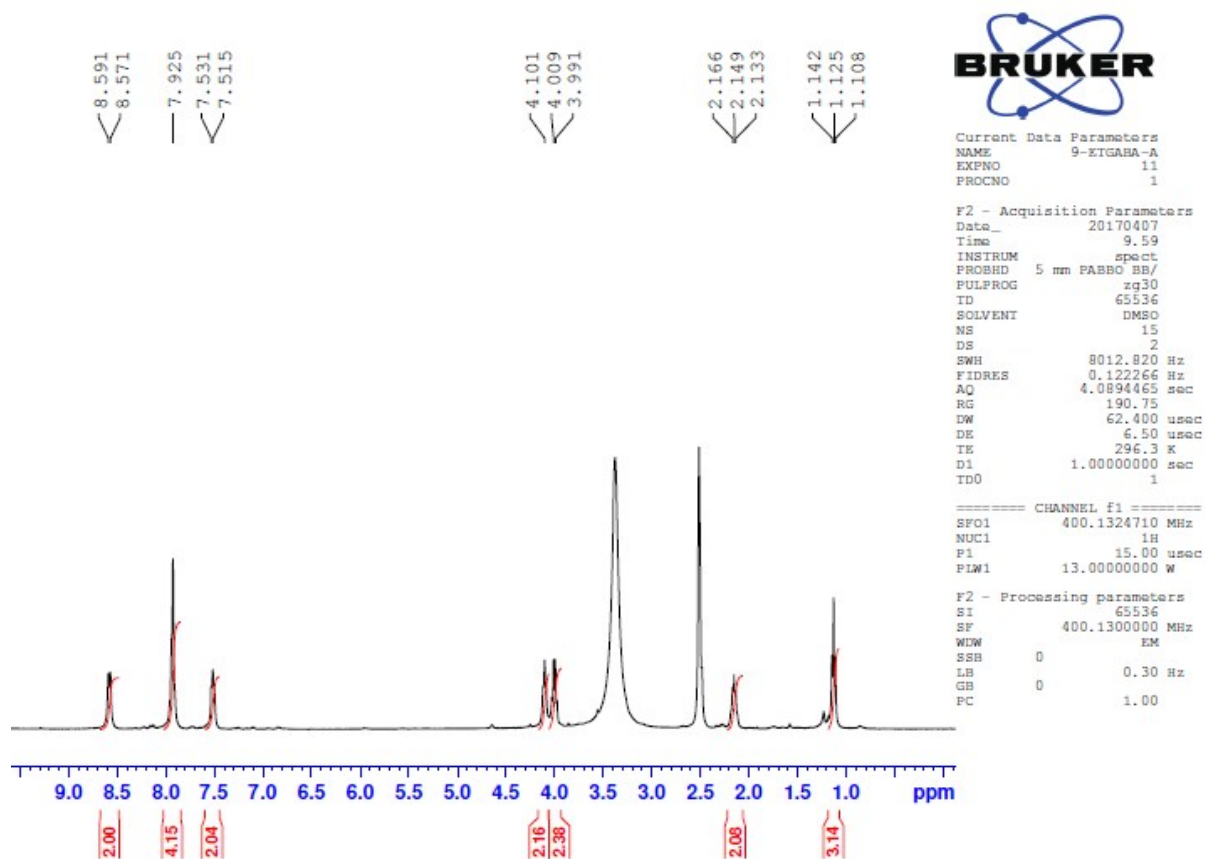

Figure S11. Compound 6 –  $^1\text{H}$  NMR

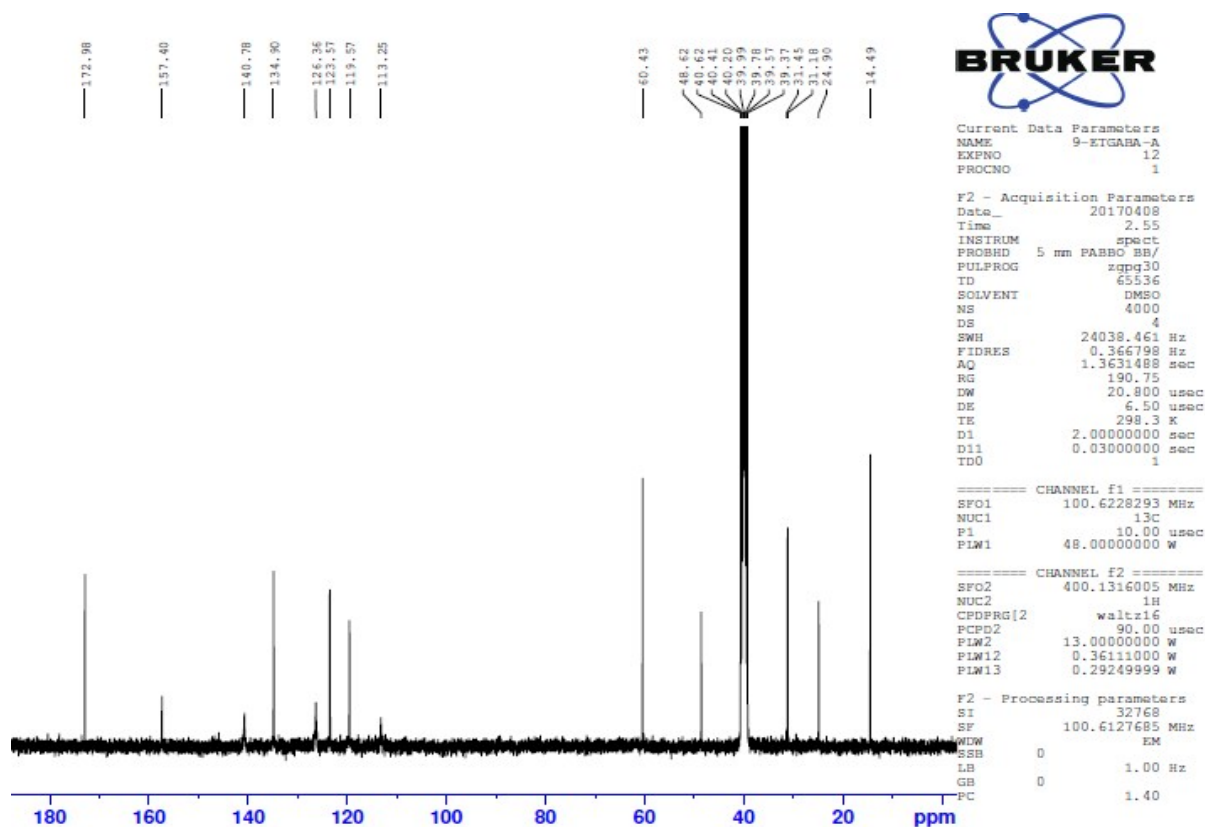

Figure S12. Compound 6 –  $^{13}\text{C}$  NMR

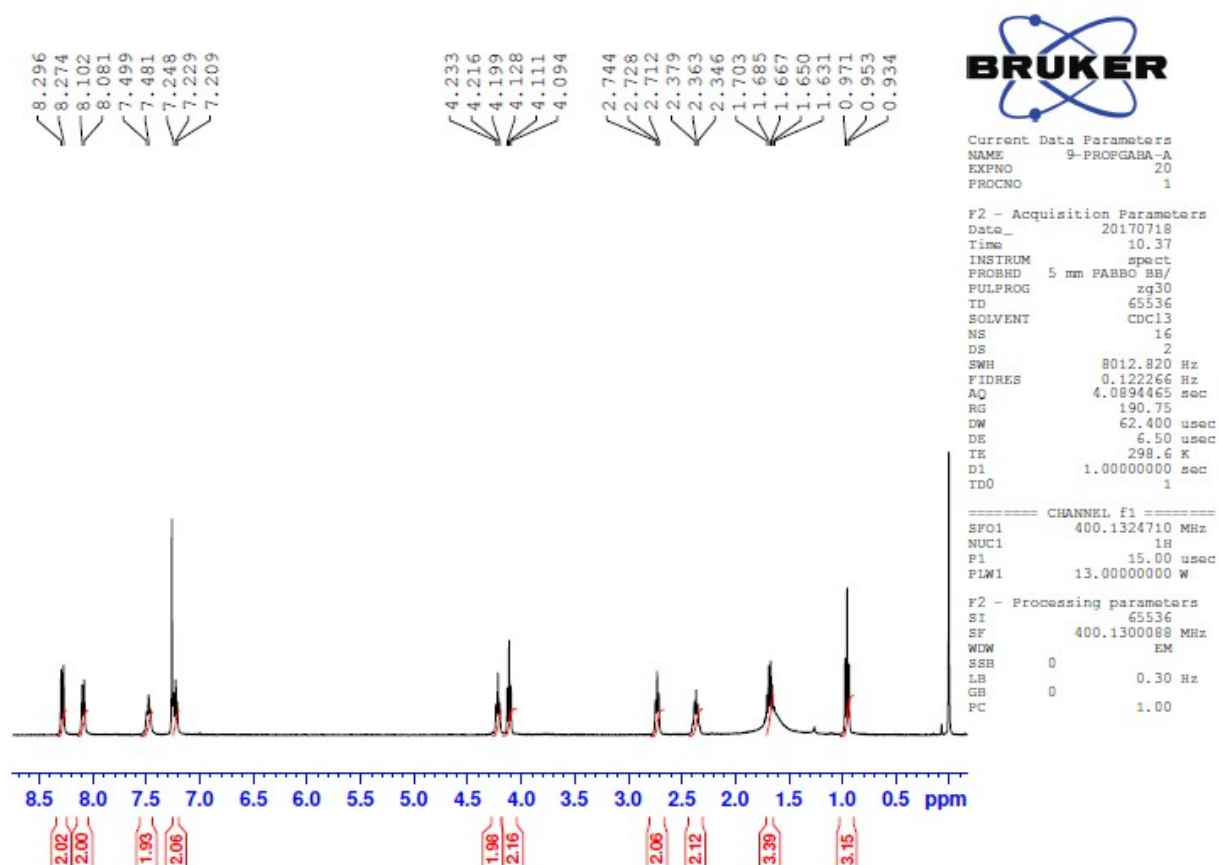

Figure S13. Compound 7 –  $^1\text{H}$  NMR

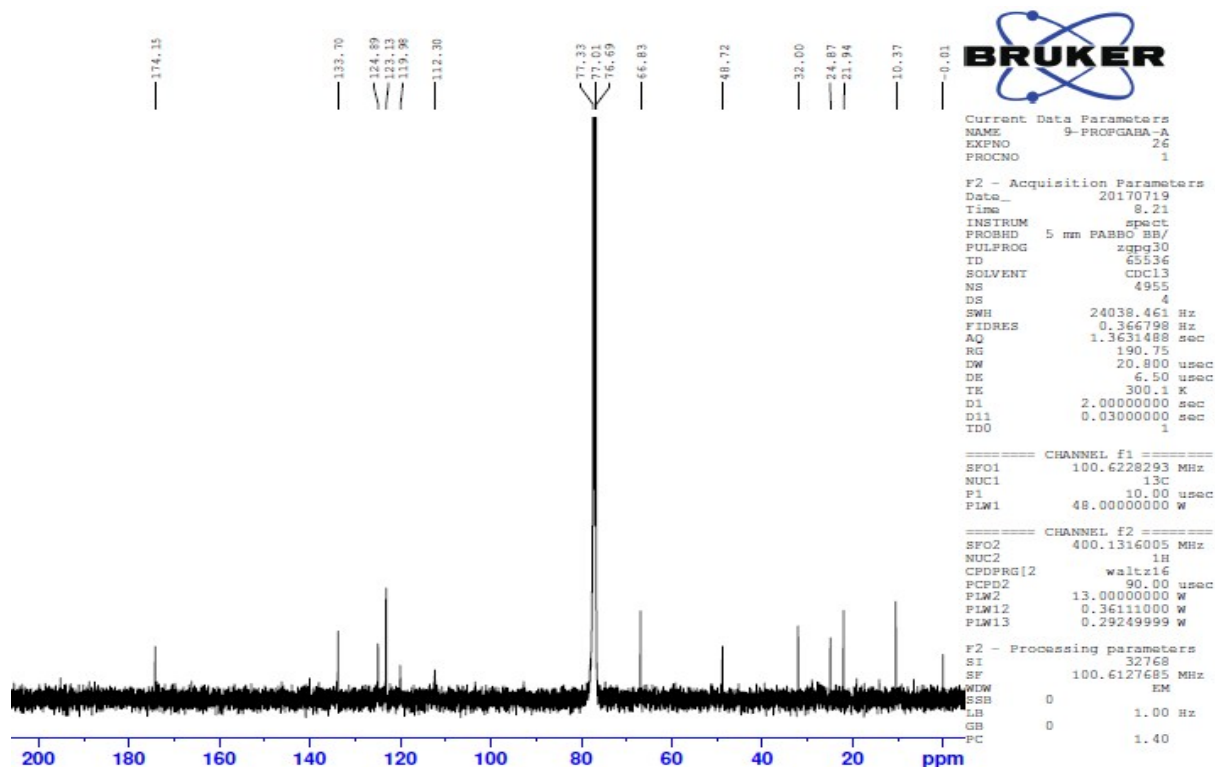

Figure S14. Compound 7 –  $^{13}\text{C}$  NMR

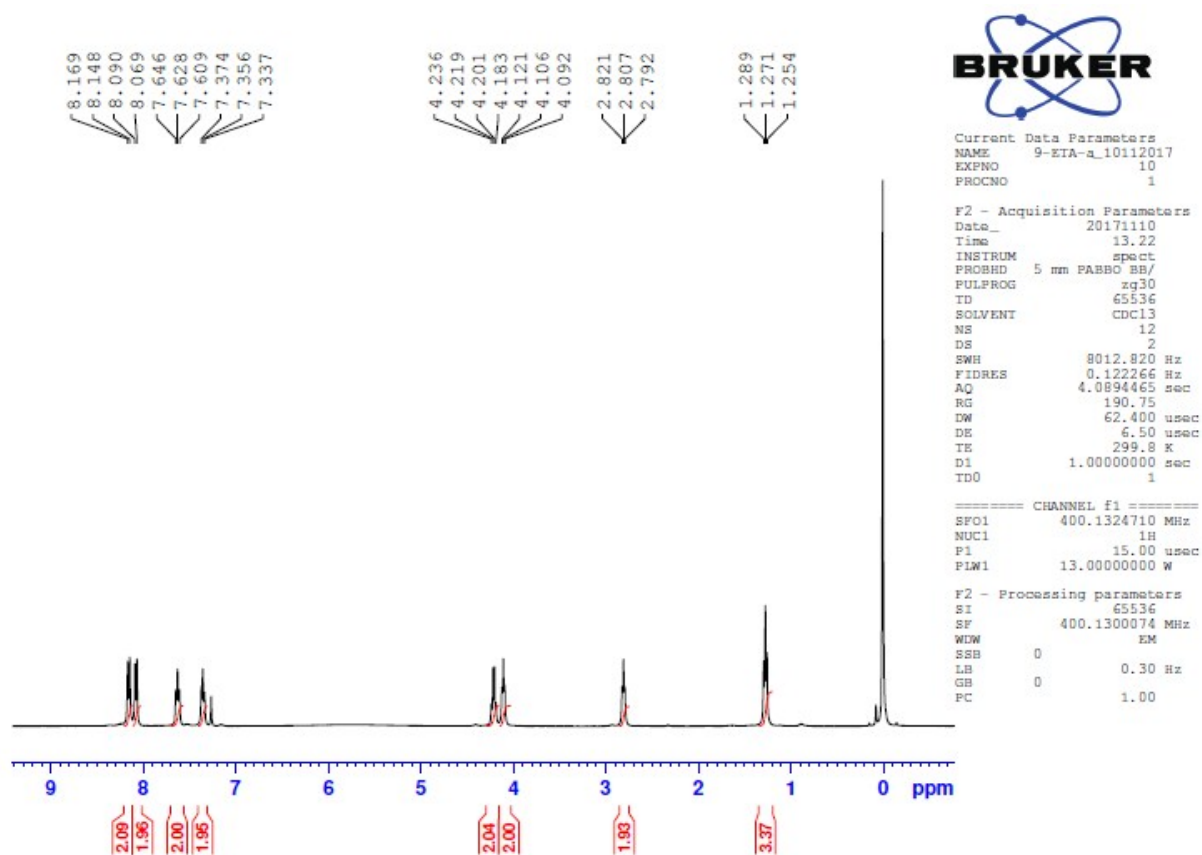

Figure S15. Compound 8 –  $^1\text{H}$  NMR

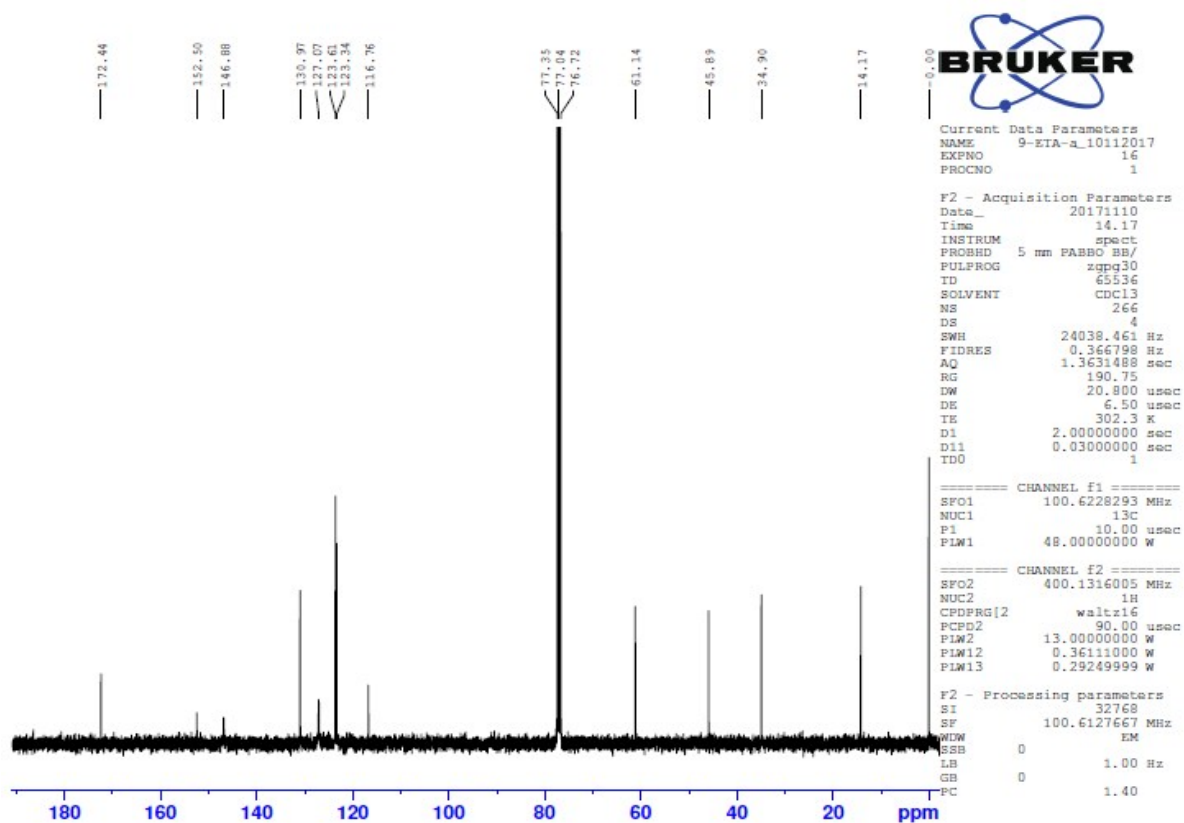

Figure S16. Compound 8 –  $^{13}\text{C}$  NMR



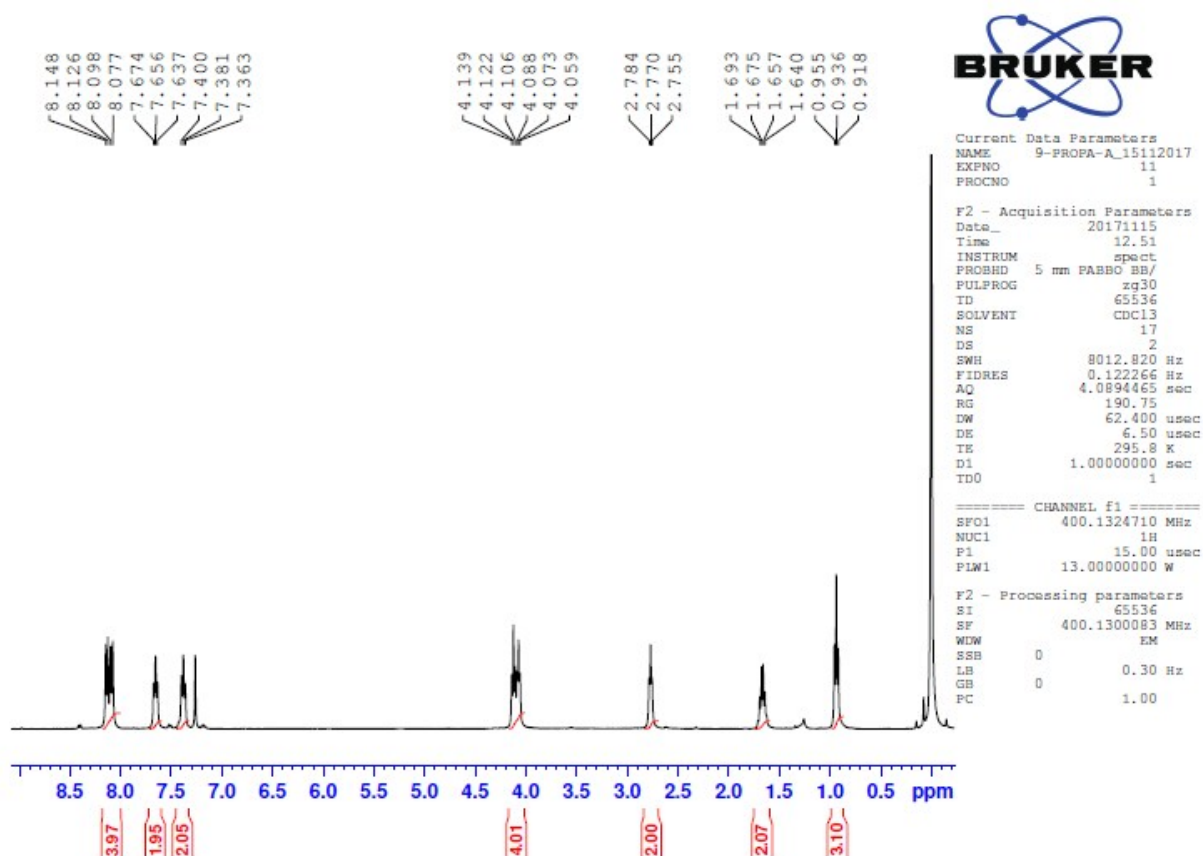

Figure S17. Compound 9 –  $^1\text{H}$  NMR

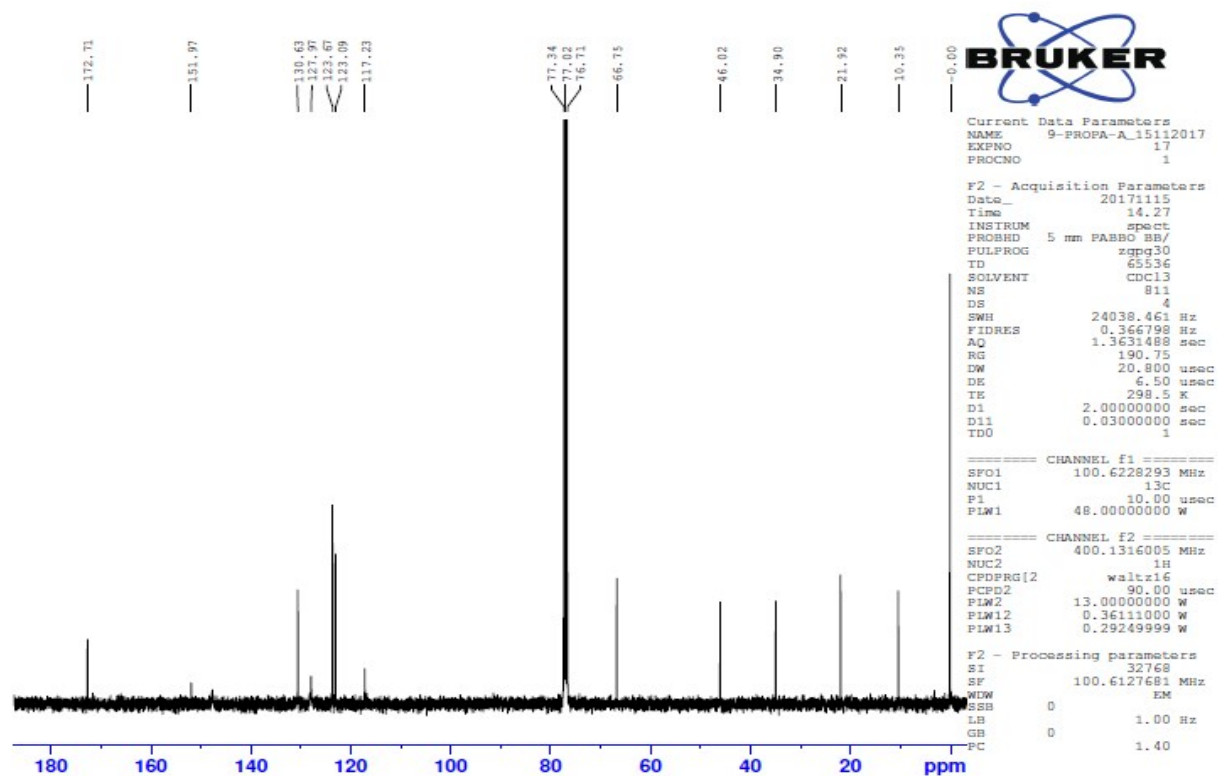

Figure S18. Compound 9 –  $^{13}\text{C}$  NMR



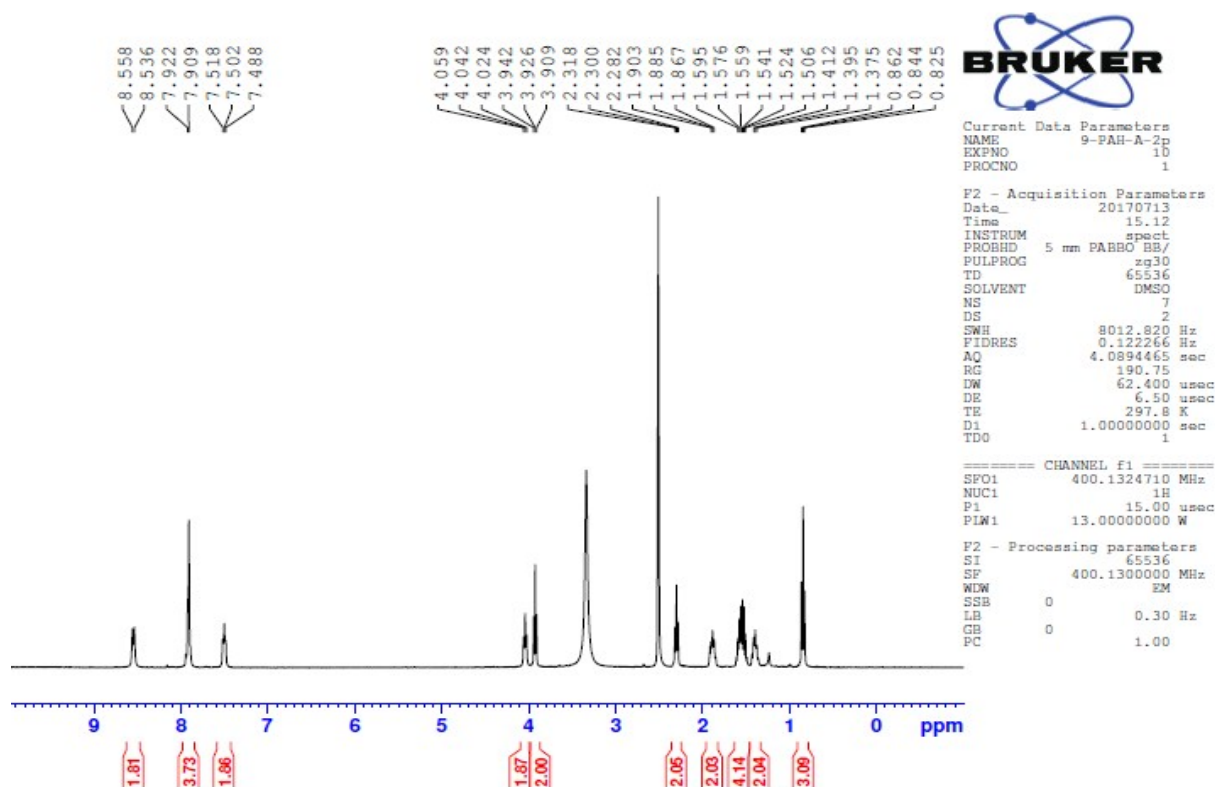

Figure S21. Compound 11 –  $^1\text{H}$  NMR

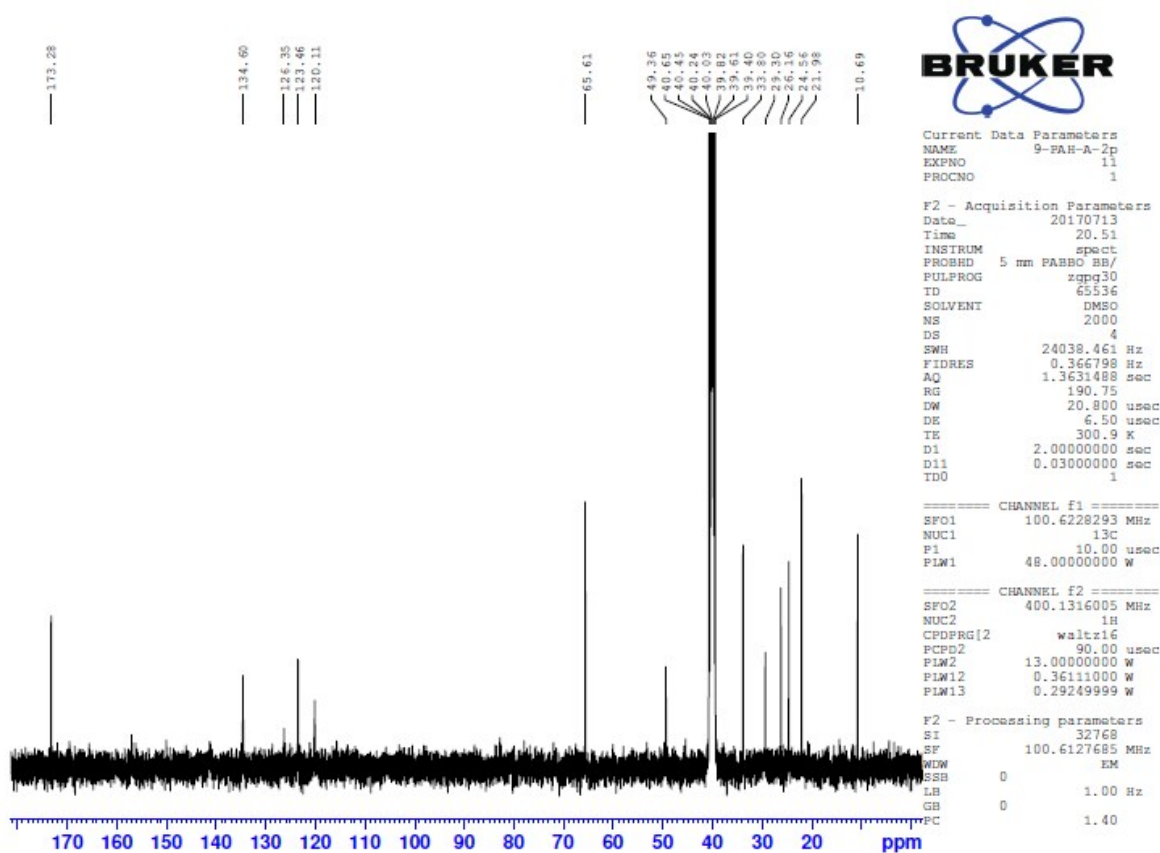

Figure S22. Compound 11 –  $^{13}\text{C}$  NMR

## HPLC analysis

The purity of tested compounds was evaluated using a HPLC method. The HPLC analysis was performed on Agilent 1200 system (Agilent Technologies, Palo Alto, CA, USA), equipped with binary pump, manual injector (20  $\mu$ l sample loop) and DAD detector. The column chosen was Zorbax Extend C18 (150 mm  $\times$  4.6 mm, 5  $\mu$ m particle size). The mobile phase consisted of methanol and water (pH was adjusted to 3.2 using phosphoric acid) in following ratios (v/v): 25:75 (compound **2**), 40:60 (compounds **6**, **8** and **9**), 50:50 (compound **7**), 55:45 (compound **10**) and 60:40 (compounds **1**, **3**, **4**, **5** and **11**). The column temperature was adjusted to 25°C and the flow rate was 1 ml/min. The UV detection was performed at 220, 230, 254, 265 and 280 nm. Sample chromatograms are presented below (**Figure S23** - **Figure S33**).

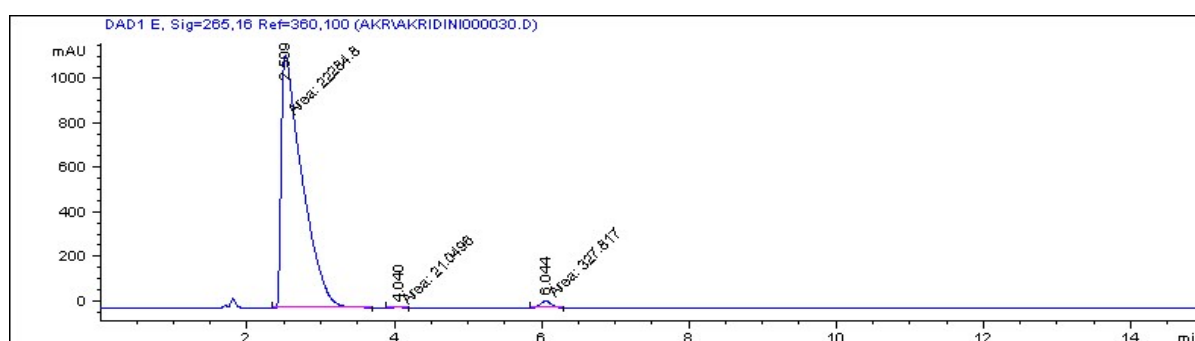

**Figure S23.** HPLC chromatogram - compound 1 (265 nm, purity: 98.5 %)

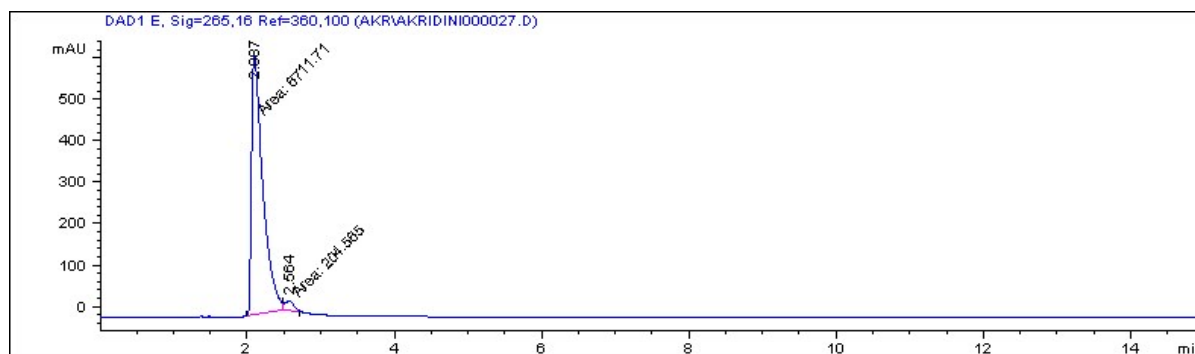

**Figure S24.** HPLC chromatogram - compound 2 (265 nm, purity: 97.0 %)

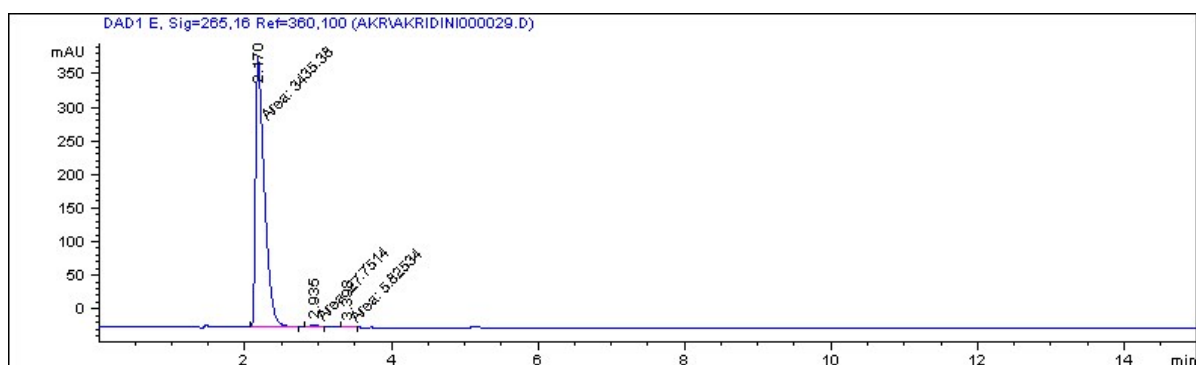

**Figure S25.** HPLC chromatogram - compound 3 (265 nm, purity: 99.0 %)

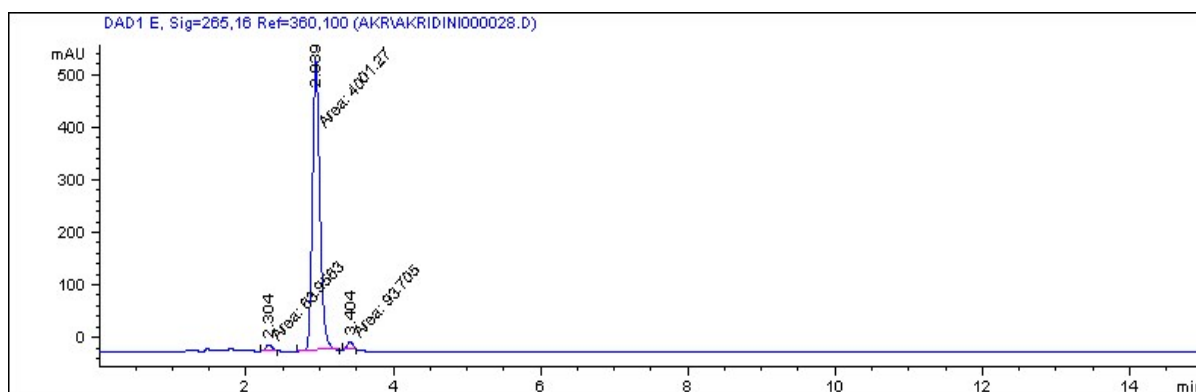

**Figure S26.** HPLC chromatogram - compound 4 (265 nm, purity: 96.2 %)

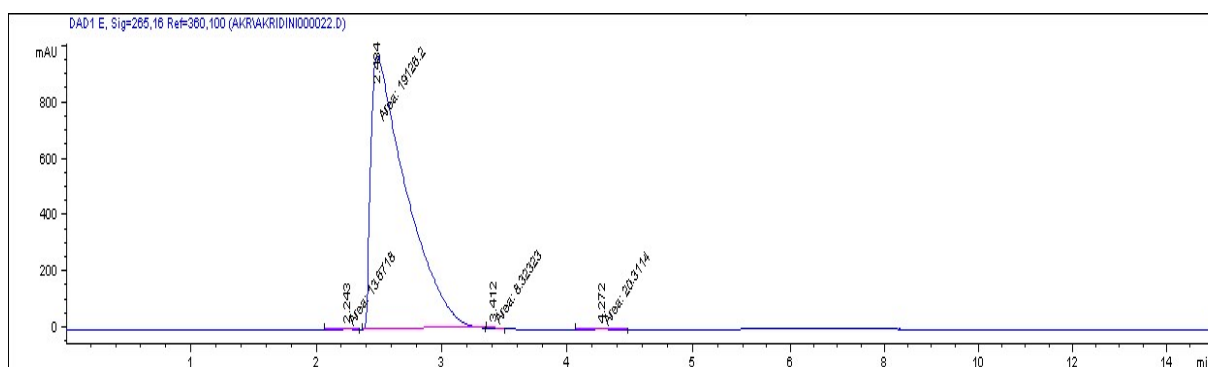

**Figure S27.** HPLC chromatogram - compound 5 (265 nm, purity: 99.8 %)

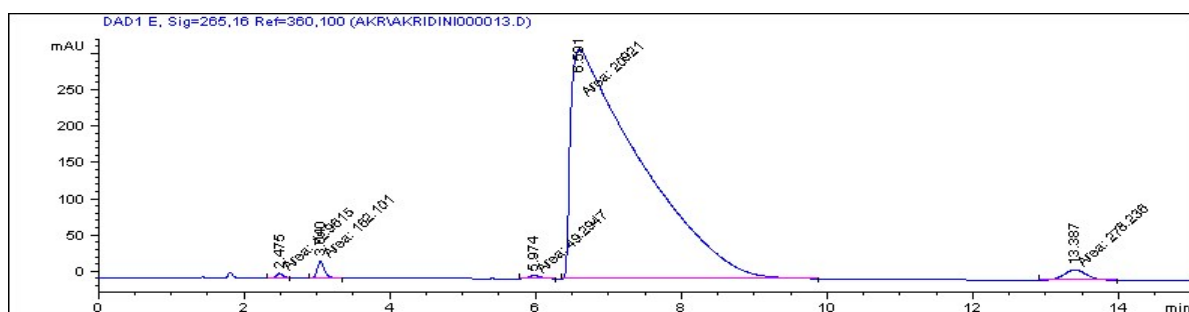

**Figure S28.** HPLC chromatogram - compound 6 (265 nm, purity: 97.3 %)

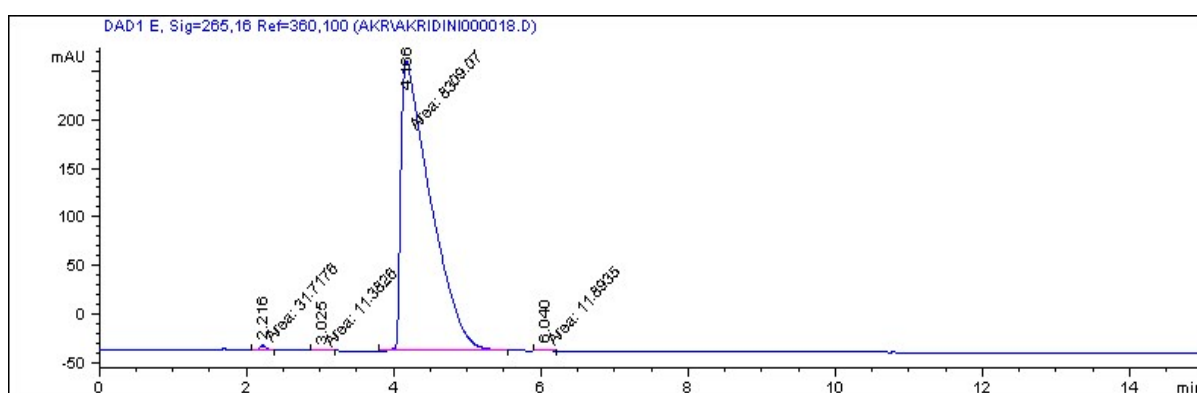

**Figure S29.** HPLC chromatogram - compound 7 (265 nm, purity: 99.2 %)

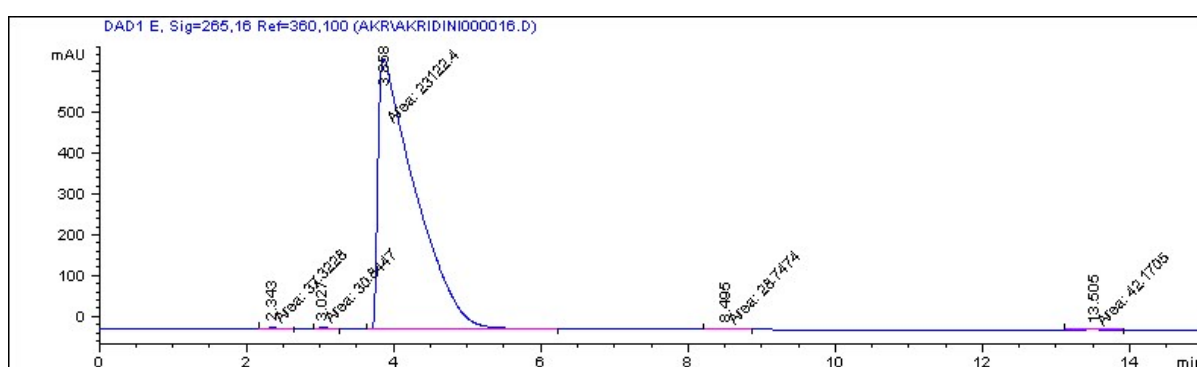

**Figure S30.** HPLC chromatogram - compound 8 (265 nm, purity: 99.4 %)

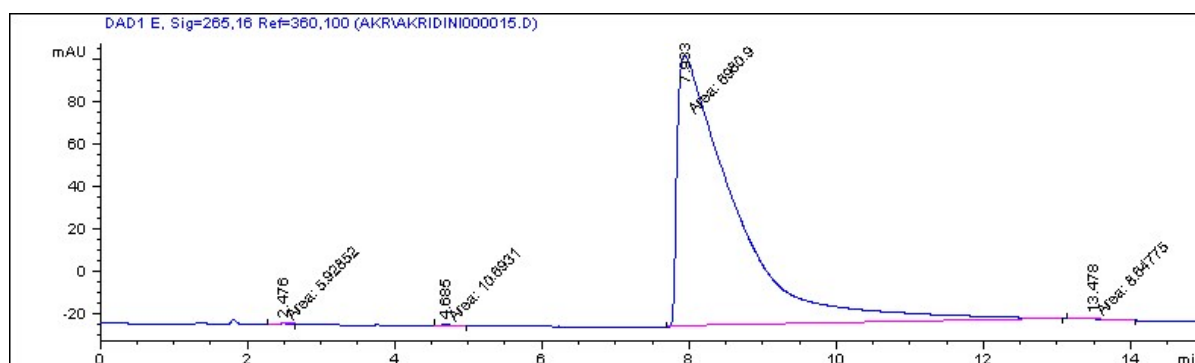

**Figure S31.** HPLC chromatogram - compound 9 (265 nm, purity: 99.5 %)

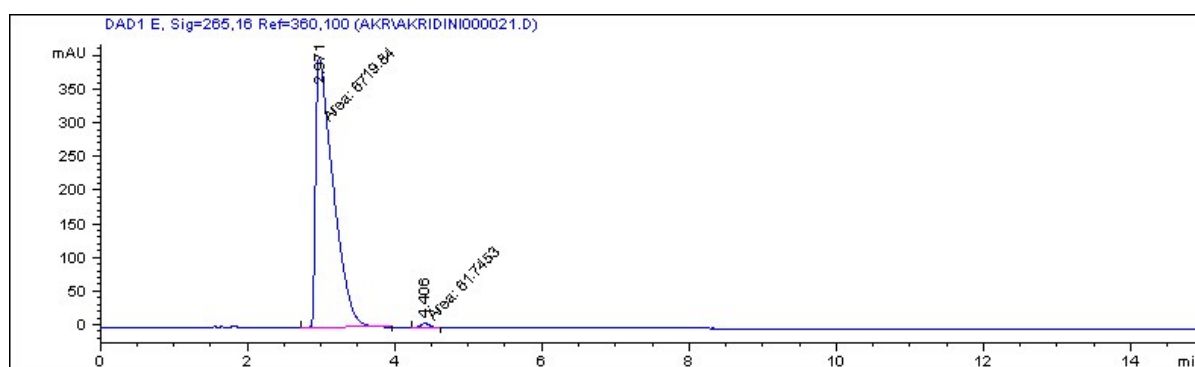

**Figure S32.** HPLC chromatogram - compound 10 (265 nm, purity: 99.1 %)

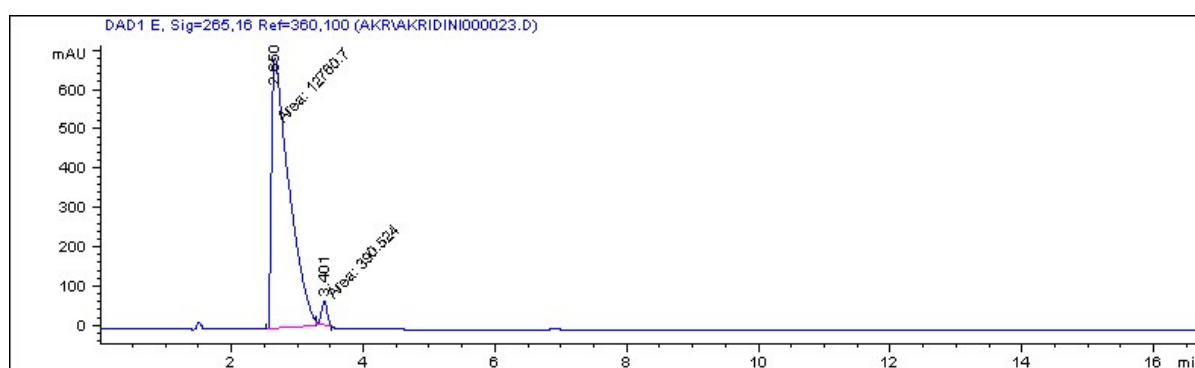

**Figure S33.** HPLC chromatogram - compound 11 (265 nm, purity: 97.0 %)

## In silico evaluation of pharmacokinetic properties and druglikeness

Pharmacokinetic properties (absorption, distribution, metabolism and excretion - ADME) and druglikeness of derivatives **6**, **7**, **8**, **9** and amsacrine were predicted using SwissADME web service<sup>1,2</sup> and results are presented in **Table S1**. Predicted pharmacokinetic properties include potential for gastrointestinal (GI) absorption, blood-brain barrier (BBB) permeability, skin permeability (permeability coefficient, LogKp), susceptibility to transport mediated by P-Glycoproteins (P-gp) and enzyme inhibition potential (CYP1A2, CYP2C19, CYP2C9, CYP2D6 and CYP3A4). Druglikeness was evaluated using Lipinski's,<sup>3</sup> Ghose's,<sup>4</sup> Veber's,<sup>5</sup> Egan's<sup>6</sup> and Muegge's<sup>7</sup> rules, as well as on the basis of bioavailability score.<sup>8</sup>

**Table S1**

Predicted pharmacokinetic properties and druglikeness of derivatives **6**, **7**, **8**, **9** and amsacrine.

|                                             | Compound |       |       |       |           |
|---------------------------------------------|----------|-------|-------|-------|-----------|
| Pharmacokinetic properties and druglikeness | 6        | 7     | 8     | 9     | amsacrine |
| GI absorption                               | High     | High  | High  | High  | High      |
| BBB permeant                                | Yes      | Yes   | Yes   | Yes   | No        |
| LogKp (skin permeation, cm/s)               | -5.30    | -5.01 | -5.15 | -4.79 | -5.85     |
| P-gp substrate                              | No       | No    | No    | No    | No        |
| CYP1A2 inhibitor                            | Yes      | Yes   | Yes   | Yes   | Yes       |
| CYP2C19 inhibitor                           | Yes      | Yes   | Yes   | Yes   | Yes       |
| CYP2C9 inhibitor                            | Yes      | Yes   | Yes   | Yes   | Yes       |
| CYP2D6 inhibitor                            | Yes      | Yes   | Yes   | Yes   | Yes       |



|                       |      |      |      |      |      |
|-----------------------|------|------|------|------|------|
| CYP3A4 inhibitor      | Yes  | Yes  | Yes  | Yes  | Yes  |
| Lipinski <sup>a</sup> | Yes  | Yes  | Yes  | Yes  | Yes  |
| Ghose <sup>a</sup>    | Yes  | Yes  | Yes  | Yes  | Yes  |
| Veber <sup>a</sup>    | Yes  | Yes  | Yes  | Yes  | Yes  |
| Egan <sup>a</sup>     | Yes  | Yes  | Yes  | Yes  | Yes  |
| Muegge <sup>a</sup>   | Yes  | Yes  | Yes  | Yes  | Yes  |
| Bioavailability score | 0.55 | 0.55 | 0.55 | 0.55 | 0.55 |

<sup>a</sup> Yes = no rule violations

All tested compounds have high predicted gastrointestinal absorption. As opposed to amsacrine, derivatives **6**, **7**, **8** and **9** were predicted to be blood-brain barrier permeants, which makes them potential candidates for treatment of brain metastases. Additionally, they were not predicted to be P-Glycoprotein substrates (P-Glycoproteins are one of the reasons for poor penetration of drugs into central nervous system,<sup>9</sup> which decreases their activity). Finally, these derivatives have „druglike“ structures since they obey to all imposed rules.

## References:

- 1 <http://www.swissadme.ch/index.php> (Accessed on 25 October 2019).
- 2 A. Daina, O. Michielin, V. Zoete, *Sci. Rep.*, 2017, **7**, 42717.
- 3 C.A. Lipinski, F. Lombardo, B.W. Dominy, P. J. Feeney, *Adv. Drug Deliv. Rev.*, 2001, **46**, 3-26.
- 4 A. K. Ghose, V. N. Viswanadhan, J. J. Wendoloski, *J. Comb. Chem.*, 1999, **1**, 55-68.

- 5 D. F. Veber, S. R. Johnson, H. Y. Cheng, B. R. Smith, K. W. Ward, K. D. Kopple, *J. Med. Chem.*, 2002, **45**, 2615-2623.
- 6 W. J. Egan, K. M. Merz Jr, J. J. Baldwin, *J. Med. Chem.*, 2000, **43**, 3867-3877.
- 7 I. Muegge, S. L. Heald, D. Brittelli, *J. Med. Chem.*, 2001, **44**, 1841-1846.
- 8 Y. C. Martin, *J. Med. Chem.*, 2005, **48**, 3164-3170.
- 9 A.H. Schinkel, *Adv. Drug Deliver. Rev.*, **1999**, *36*, 179–194.
